# Supplementary material for: Cooccurrence of N501Y, P681R and other key mutations in SARS-CoV-2 Spike
Source: bioRxiv or medRxiv preprint supplement (doi:10.1101/2021.12.25.21268404), 2022-01-02

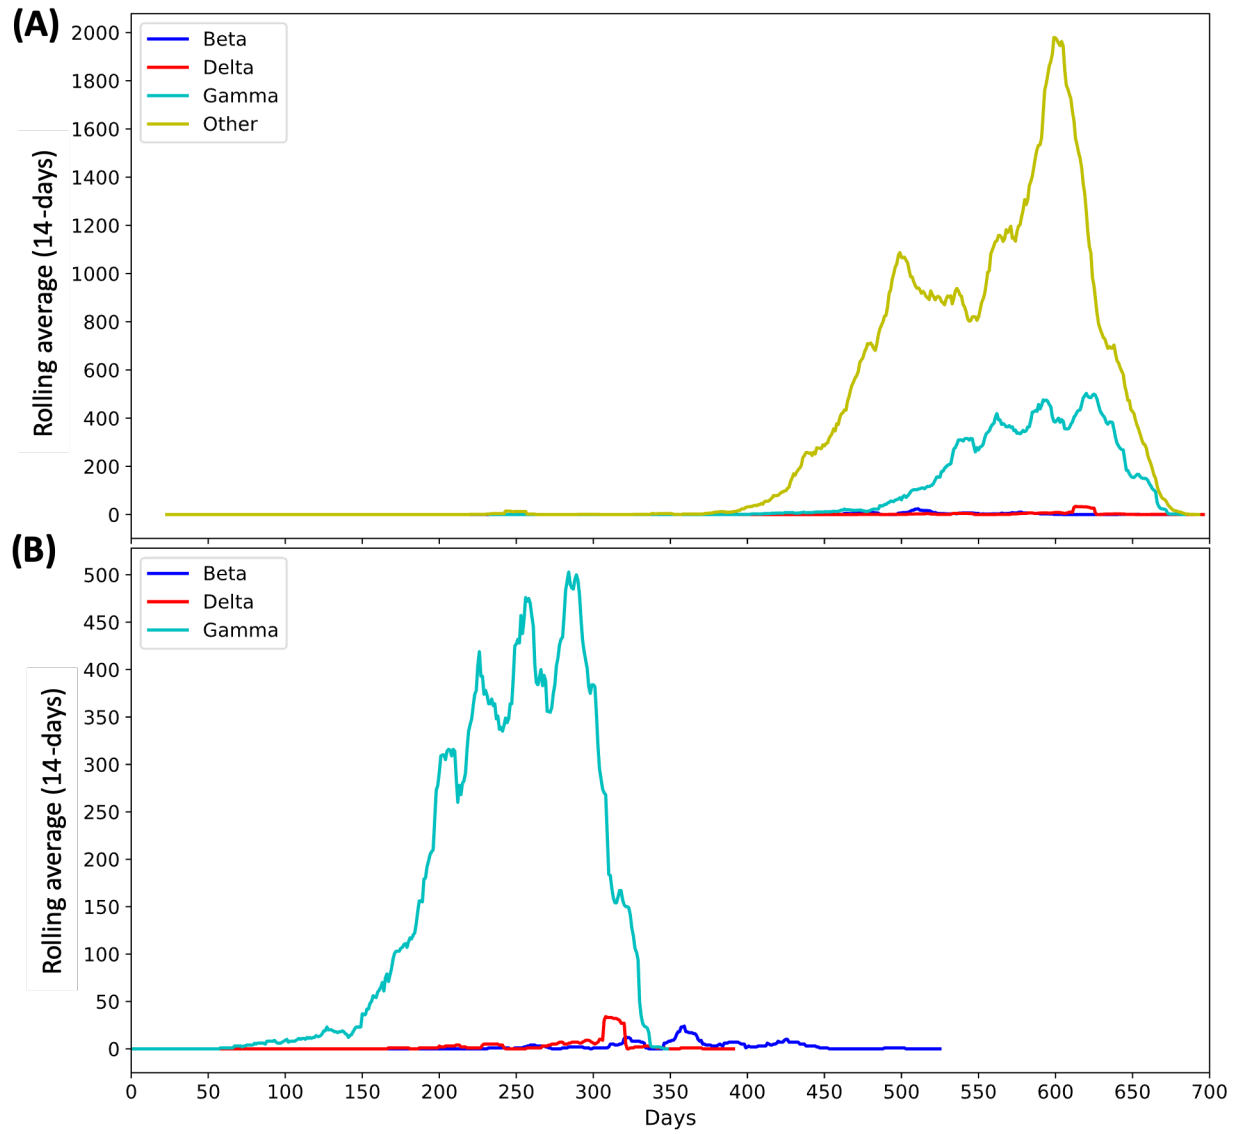

Supplement: Supplementary file [file media-2.pdf]
